# Supplementary material for: X-ray vision: the accuracy and repeatability of a technology that allows clinicians to see spinal X-rays superimposed on a person's back
Source: PeerJ. 2019 Feb 13;7:e6333. doi: 10.7717/peerj.6333 (PMC6377589; doi:10.7717/peerj.6333)
Supplement: Supplemental Information 1 [file peerj-07-6333-s001.xlsx]

## Sheet: Numerical
ID number	DL1SS1T1	DL1SS1T2	DL1SS1T3	DL1S1AVG	DL2SS1T1	DL2SS1T2	DL2SS1T3	DL2S1AVG	DL3SS1T1	DL3SS1T2	DL3SS1T3	DL3S1AVG	DL4SS1T1	DL4SS1T2	DL4SS1T3	DL4S1AVG	DL5SS1T1	DL5SS1T2	DL5SS1T3	DL5S1AVG	DL1SS2T1	DL1SS2T2	DL1SS2T3	DL1S2AVG	DL2SS2T1	DL2SS2T2	DL2SS2T3	DL2S2AVG	DL3SS2T1	DL3SS2T2	DL3SS2T3	DL3S2AVG	DL4SS2T1	DL4SS2T2	DL4SS2T3	DL4S2AVG	DL5SS2T1	DL5SS2T2	DL5SS2T3	DL5S2AVG		AL1SS1T1	AL1SS1T2	AL1SS1T3	AL1S1AVG	AL2SS1T1	AL2SS1T2	AL2SS1T3	AL2S1AVG
1	7.007	13.44	13.236	11.2277	5.397	8.235	6.32	6.65067	3.455	7.28	1.814	4.183	4.936	6.073	2.18	4.39633	8.925	8.649	8.649	8.741	22.37	17.11	17.5	18.9933	19.45	15.83	17.5	17.5933	16.89	14.5	14.3	15.23	13.52	11.47	12.4	12.4633	6.7	5.87	5.3	5.95667		79.216	72.897	94.289	82.13	58.241	53.13	93.945	68.44
2	8.611	9.78	12.821	10.404	8.312	7.698	12.83	9.61333	6.863	5.966	10.584	7.80433	7.121	5.24	7.34	6.567	10.188	9.34	7.031	8.853	4.449	7.416	9.754	7.20633	3.316	11.764	10.111	8.397	7.693	15.41	13.486	12.1963	11.473	16.094	14.34	13.969	13.576	14.673	13.417	13.8887		-19.406	36.973	-24.609	-2.35	-14.036	45	-29.597	0.46
3	4.446	12.383	7.569	8.13267	3.847	8.57	4.975	5.79733	3.87	5.62	2.93	4.14	4.136	5.525	1.49	3.717	4.85	6.03	3.763	4.881	9.192	4.866	7.116	7.058	6.672	4.364	5.716	5.584	5.77	5.969	4.758	5.499	2.768	4.031	1.976	2.925	1.523	1.598	0.420139	1.18038		-46.848	-40.4	-73.229	-53.49	-60.068	-25.665	-85.426	-57.05
4f	13.251	10.164	8.543	10.6527	10.129	9.232	3.59	7.65033	7.906	9.689	2.432	6.67567	4.202	7.534	2.945	4.89367	4.138	4.084	2.795	3.67233	6.889	8.086	2.109	5.69467	5.869	7.977	1.537	5.12767	3.94	5.209	3.588	4.24567	4.041	3.551	1.431	3.00767	2.66	2.72	2.292	2.55733		-96.194	-73.025	-83.884	-84.37	-93.468	-81.06	-70.017	-81.52
5	3.588	5.757	7.518	5.621	3.11	3.388	5.161	3.88633	4.93	3.082	4.178	4.06333	3.934	3.169	2.563	3.222	9.203	4.504	4.595	6.10067	7.6	5.075	5.84	6.17167	10.124	6.599	7.79	8.171	14.464	9.075	8.054	10.531	13.312	8.603	4.597	8.83733	10.641	7.23	2.526	6.799		10.62	-31.891	-51.47	-24.25	50.711	-3.691	-63.435	-5.47
6	9.038	7.29	12.279	9.53567	10.21	10.117	17.265	12.5307	11.759	10.355	15.751	12.6217	12.689	10.132	15.865	12.8953	10.942	7.677	12.106	10.2417																						2.827	-56.547	-82.614	-45.44	-37.493	-62.879	-79.495	-59.96
7	11.47	2.45	2.58	5.5	9.37	5.32	1.73	5.47333	7.14	6.99	3.02	5.71667	2.16	12.96	7.51	7.54333	1.79	17.71	9.96	9.82	12.223	8.457	9.561	10.0803	9.841	7.444	9.94	9.075	4.29	3.176	2.15	3.20533	5.116	4.598	5.055	4.923	7.306	7.56	7.752	7.53933		-80.17	81.57	-24.78	-7.8	-86.19	94.84	30.47	13
8	6.099	2.362	11.667	6.70933	5.856	5.743	11.717	7.772	9.878	10.342	19.229	13.1497	9.695	10.451	15.466	11.8707	4.466	8.202	9.676	7.448	12.727	19.889	16.305	16.307	10.434	16.431	15.539	14.1347	10.771	13.012	17.978	13.9203	6.257	13.169	15.993	11.8063	4.466	6.415	14.956	8.61233		2.961	-63.435	-86.906	-49.13	-25.201	-79.509	-83.83	-62.85
9	7.162	11.759	6.444	8.455	5.758	8.855	4.121	6.24467	7.534	8.738	4.726	6.99933	8.61	9.85	5.696	8.052	6.642	9.503	5.629	7.258	4.349	14.302	19.226	12.6257	3.35	15.312	16.52	11.7273	2.271	14.395	12.837	9.83433	2.823	11.232	10.644	8.233	2.166	3.212	6.489	3.95567		19.832	18.605	52.125	30.19	-13.241	0.497222	23.806	3.69
10	16.247	14.043	15.608	15.2993	13.352	9.355	13.177	11.9613	7.311	4.728	5.279	5.77267	7.015	4.805	6.187	6.00233	11.299	11.32	11.838	11.4857	18.518	18.902	17.679	18.3663	14.904	14.466	12.158	13.8427	11.947	10.149	8.605	10.2337	10.479	6.564	4.014	7.019	10.766	5.094	8.274	8.04467		-56.634	-59.191	-66.371	-60.73	-56.178	-60.086	-66.038	-60.77
11	13.121	15.081	12.204	13.4687	12.659	14.763	13.719	13.7137	16.349	16.042	15.92	16.1037	19.843	20.175	19.852	19.9567	20.224	20.542	24.23	21.6653	15.845	10.7	12.046	12.8637	17.566	12.931	13.052	14.5163	21.188	15.133	13.692	16.671	21.441	16.867	15.972	18.0933	20.087	16.076	13.257	16.4733		-40.799	-13.263	-14.394	-22.82	-36.304	-30.754	-38.797	-35.29
12f	6.242	1.185	3.738	3.72167	9.251	2.903	6.911	6.355	7.658	3.403	6.519	5.86	7.267	3.997	8.545	6.603	4.594	1.075	6.081	3.91667	3.144	2.796	3.455	3.13167	5.488	5.73	6.754	5.99067	4.621	5.433	8.032	6.02867	3.837	5.518	7.44	5.59833	5.674	8.066	8.84	7.52667		95.389	-29.055	82.875	49.74	82.073	46.637	79.261	69.32
13f	9.219	18.624	10.542	12.795	9.43	16.525	10.916	12.2903	6.988	7.184	5.296	6.48933	2.887	4.758	2.907	3.51733	5.835	2.182	6.509	4.842	12.443	9.51	8.775	10.2427	9.012	8.245	8.817	8.69133	7.739	4.924	7.92	6.861	7.107	1.938	4.934	4.65967	2.308	4.536	6.77	4.538		46.909	51.082	33.69	43.89	66.975	67.094	46.202	60.09
[truncated: 32 more columns]

## Sheet: Nominal
ID number	L1S1	L1S2	L2S1	L2S2	L3S1	L3S2	L4S1	L4S2	L5S1	L5S2
1	0	0	1	0	1	0	1	0	1	1
2	1	1	1	1	1	0	1	0	1	0
3	1	1	1	1	1	1	1	1	1	1
4	0	1	1	1	1	1	1	1	1	1
5	1	1	1	1	1	1	1	1	1	1
6	1		0		0		0		0
7	1	1	1	1	1	1	1	1	0	1
8	1	0	1	0	0	0	0	0	1	1
9	1	0	1	0	1	1	1	1	1	1
10	0	0	0	0	1	1	1	1	0	1
11	1	1	1	1	0	0	0	0	0	0
12	1	1	1	1	1	1	1	1	1	1
13	1	1	0	1	1	1	1	1	1	1
